# Supplementary material for: Photoelectron spectrum of the pyridyl radical
Source: Royal Society of Chemistry journal article supplement (doi:10.1039/d4cp00688g), 2024-01-01
Supplement: d4cp00688g1.pdf [file d4cp00688g1.pdf]

Electronic Supplementary Information for  
**Photoelectron Spectrum of the Pyridyl Radical**

Emil Karaev,<sup>a</sup> Marius Gerlach,<sup>a</sup> Katharina Theil,<sup>a</sup> Gustavo A. Garcia,<sup>b</sup> Christian Alcaraz,<sup>c</sup>  
Jean-Christophe Loison,<sup>d</sup> and Ingo Fischer\*<sup>a</sup>

<sup>a</sup> Institute of Physical and Theoretical Chemistry, University of Würzburg, Am Hubland,  
97074 Würzburg, Germany. E-mail: ingo.fischer@uni-wuerzburg.de.

<sup>b</sup> Synchrotron Soleil, L'Orme des Merisiers, St Aubin, B.P. 48, F-91192 Gif sur Yvette,  
France.

<sup>c</sup> Université Paris-Saclay, CNRS, Institut de Chimie Physique, UMR8000, 91405 Orsay,  
France

<sup>d</sup> ISM-CNRS, Université de Bordeaux, 351 cours de la Libération, F-33405 Talence,  
France

|                                                                  | Page |
|------------------------------------------------------------------|------|
| Calculated ionisation energies for the open shell <i>isomers</i> | S2   |
| SPES of $m/z = 78$ from 9.5 – 10.2 eV                            | S3   |
| Reference                                                        | S3   |

Table S1: Calculated ionisation energies for the open shell isomers suggested by Liu et al.<sup>[1]</sup>

|   | Open shell isomer                                                                   | $IE_{\text{calc.}}(S_0^+)/\text{eV}$ | $IE_{\text{calc.}}(T_1^+)/\text{eV}$ |
|---|-------------------------------------------------------------------------------------|--------------------------------------|--------------------------------------|
| 1 | 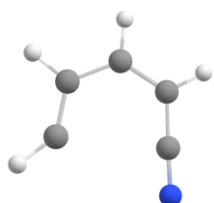   | 6.10                                 | 9.11 eV                              |
| 2 |    | 4.42                                 | 8.47                                 |
| 3 |    | no convergence                       | 8.35                                 |
| 4 |  | 6.45                                 | 8.98                                 |
| 5 |  | 5.20                                 | 8.19                                 |

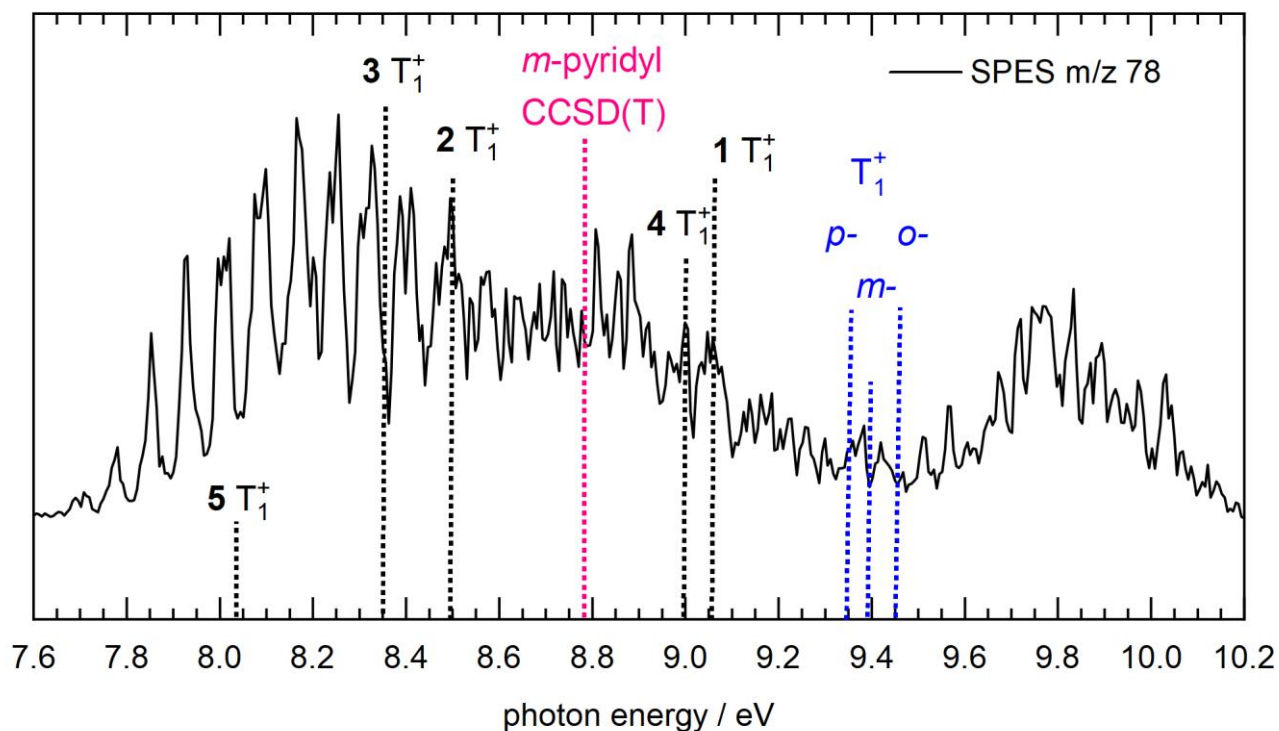

Fig. S1: SPES of  $m/z = 78$  from 9.5 – 10.2 eV. The IE of *m*-pyridyl, computed by CCSD(T) is given as a purple line. For comparison the computed IEs for transitions into the triplet cation of the open-chain isomers are given as black lines. A second band starting at 9.6 eV is most likely due to transitions into the triplet states of the pyridyl cations. Due to the close-lying ionization energies, an identification of further isomers in addition to *o*- and *p*-pyridyl is not possible.

## Notes and references

[1]: R. Liu, T. T.-S. Huang, J. Tittle and D. Xia, *J. Phys. Chem. A*, 2000, **104**, 8368–8374.
